# Supplementary material
Source: PubMed Central journal article supplement (PMC3442196)

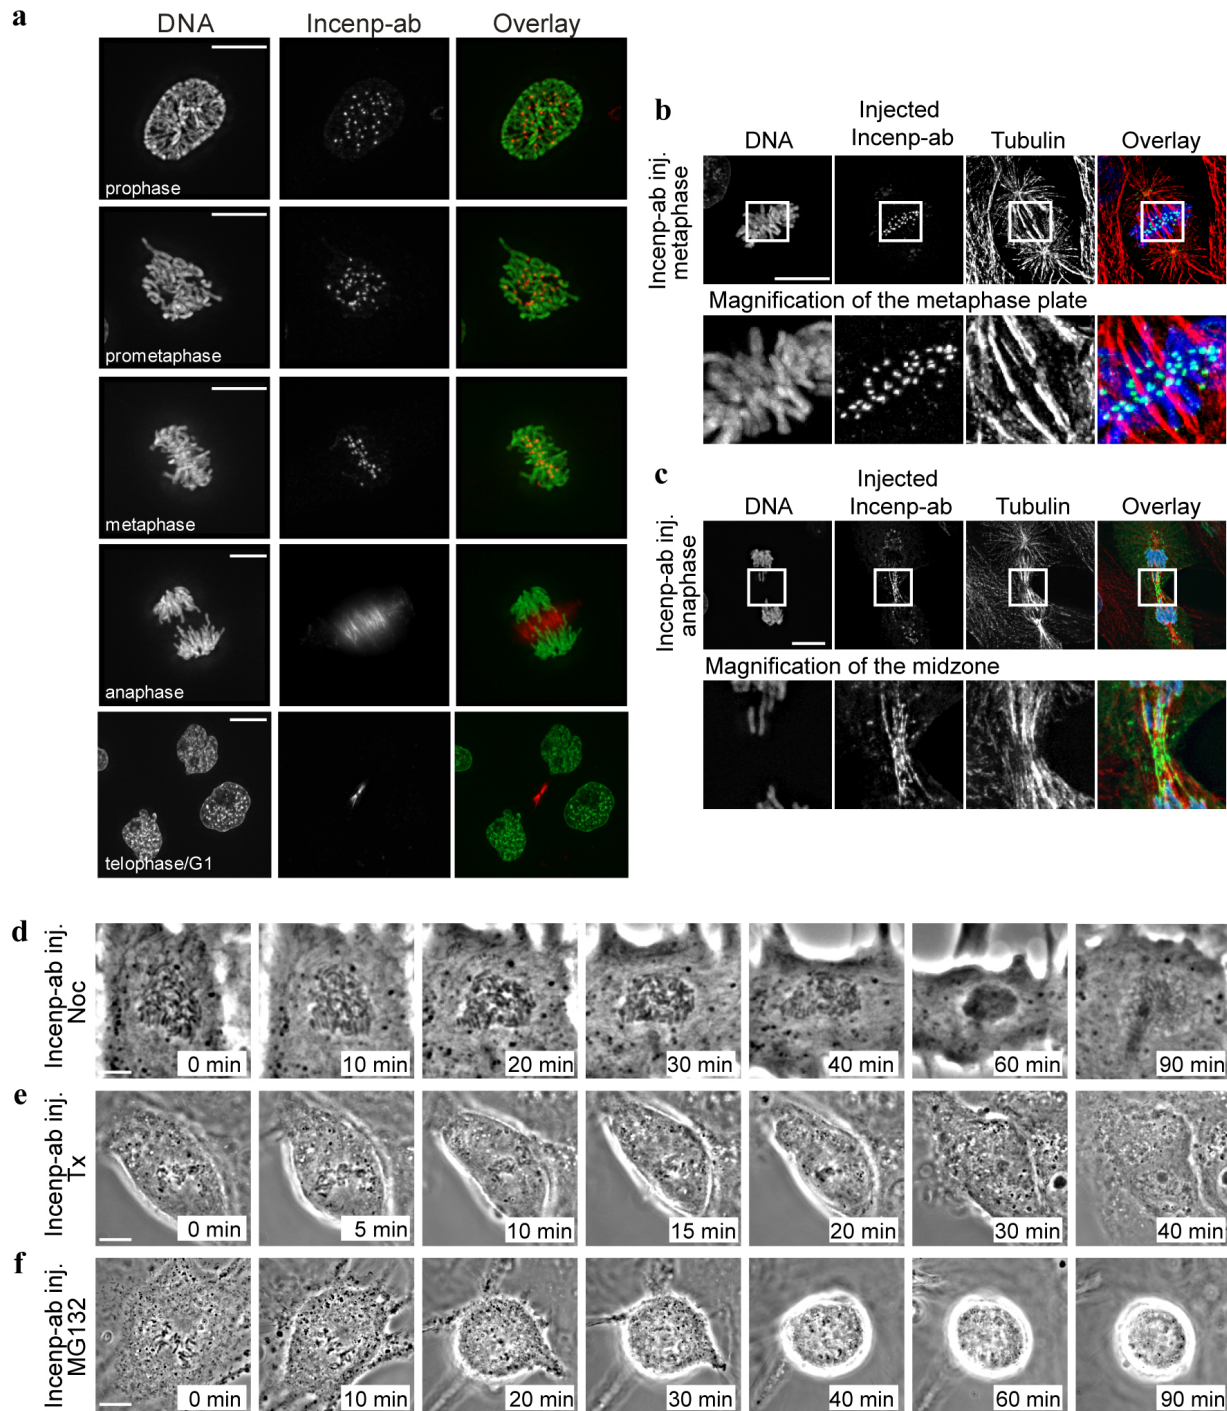

Figure S1

Supplement: NIHMS391053-supplement-Supplementary_Figure_1.pdf [file NIHMS391053-supplement-Supplementary_Figure_1.pdf]
